# Supplementary material for: SpineScan: a deep learning model for lumbar spine MRI annotation and Pfirrmann grading assessment
Source: Research Square preprint supplement (doi:10.21203/rs.3.rs-6914052/v1), 2025-07-01
Supplement: Supplementary file 2 [file b1aa9f433e5061337b6c4936.docx]

***Supplementary files***


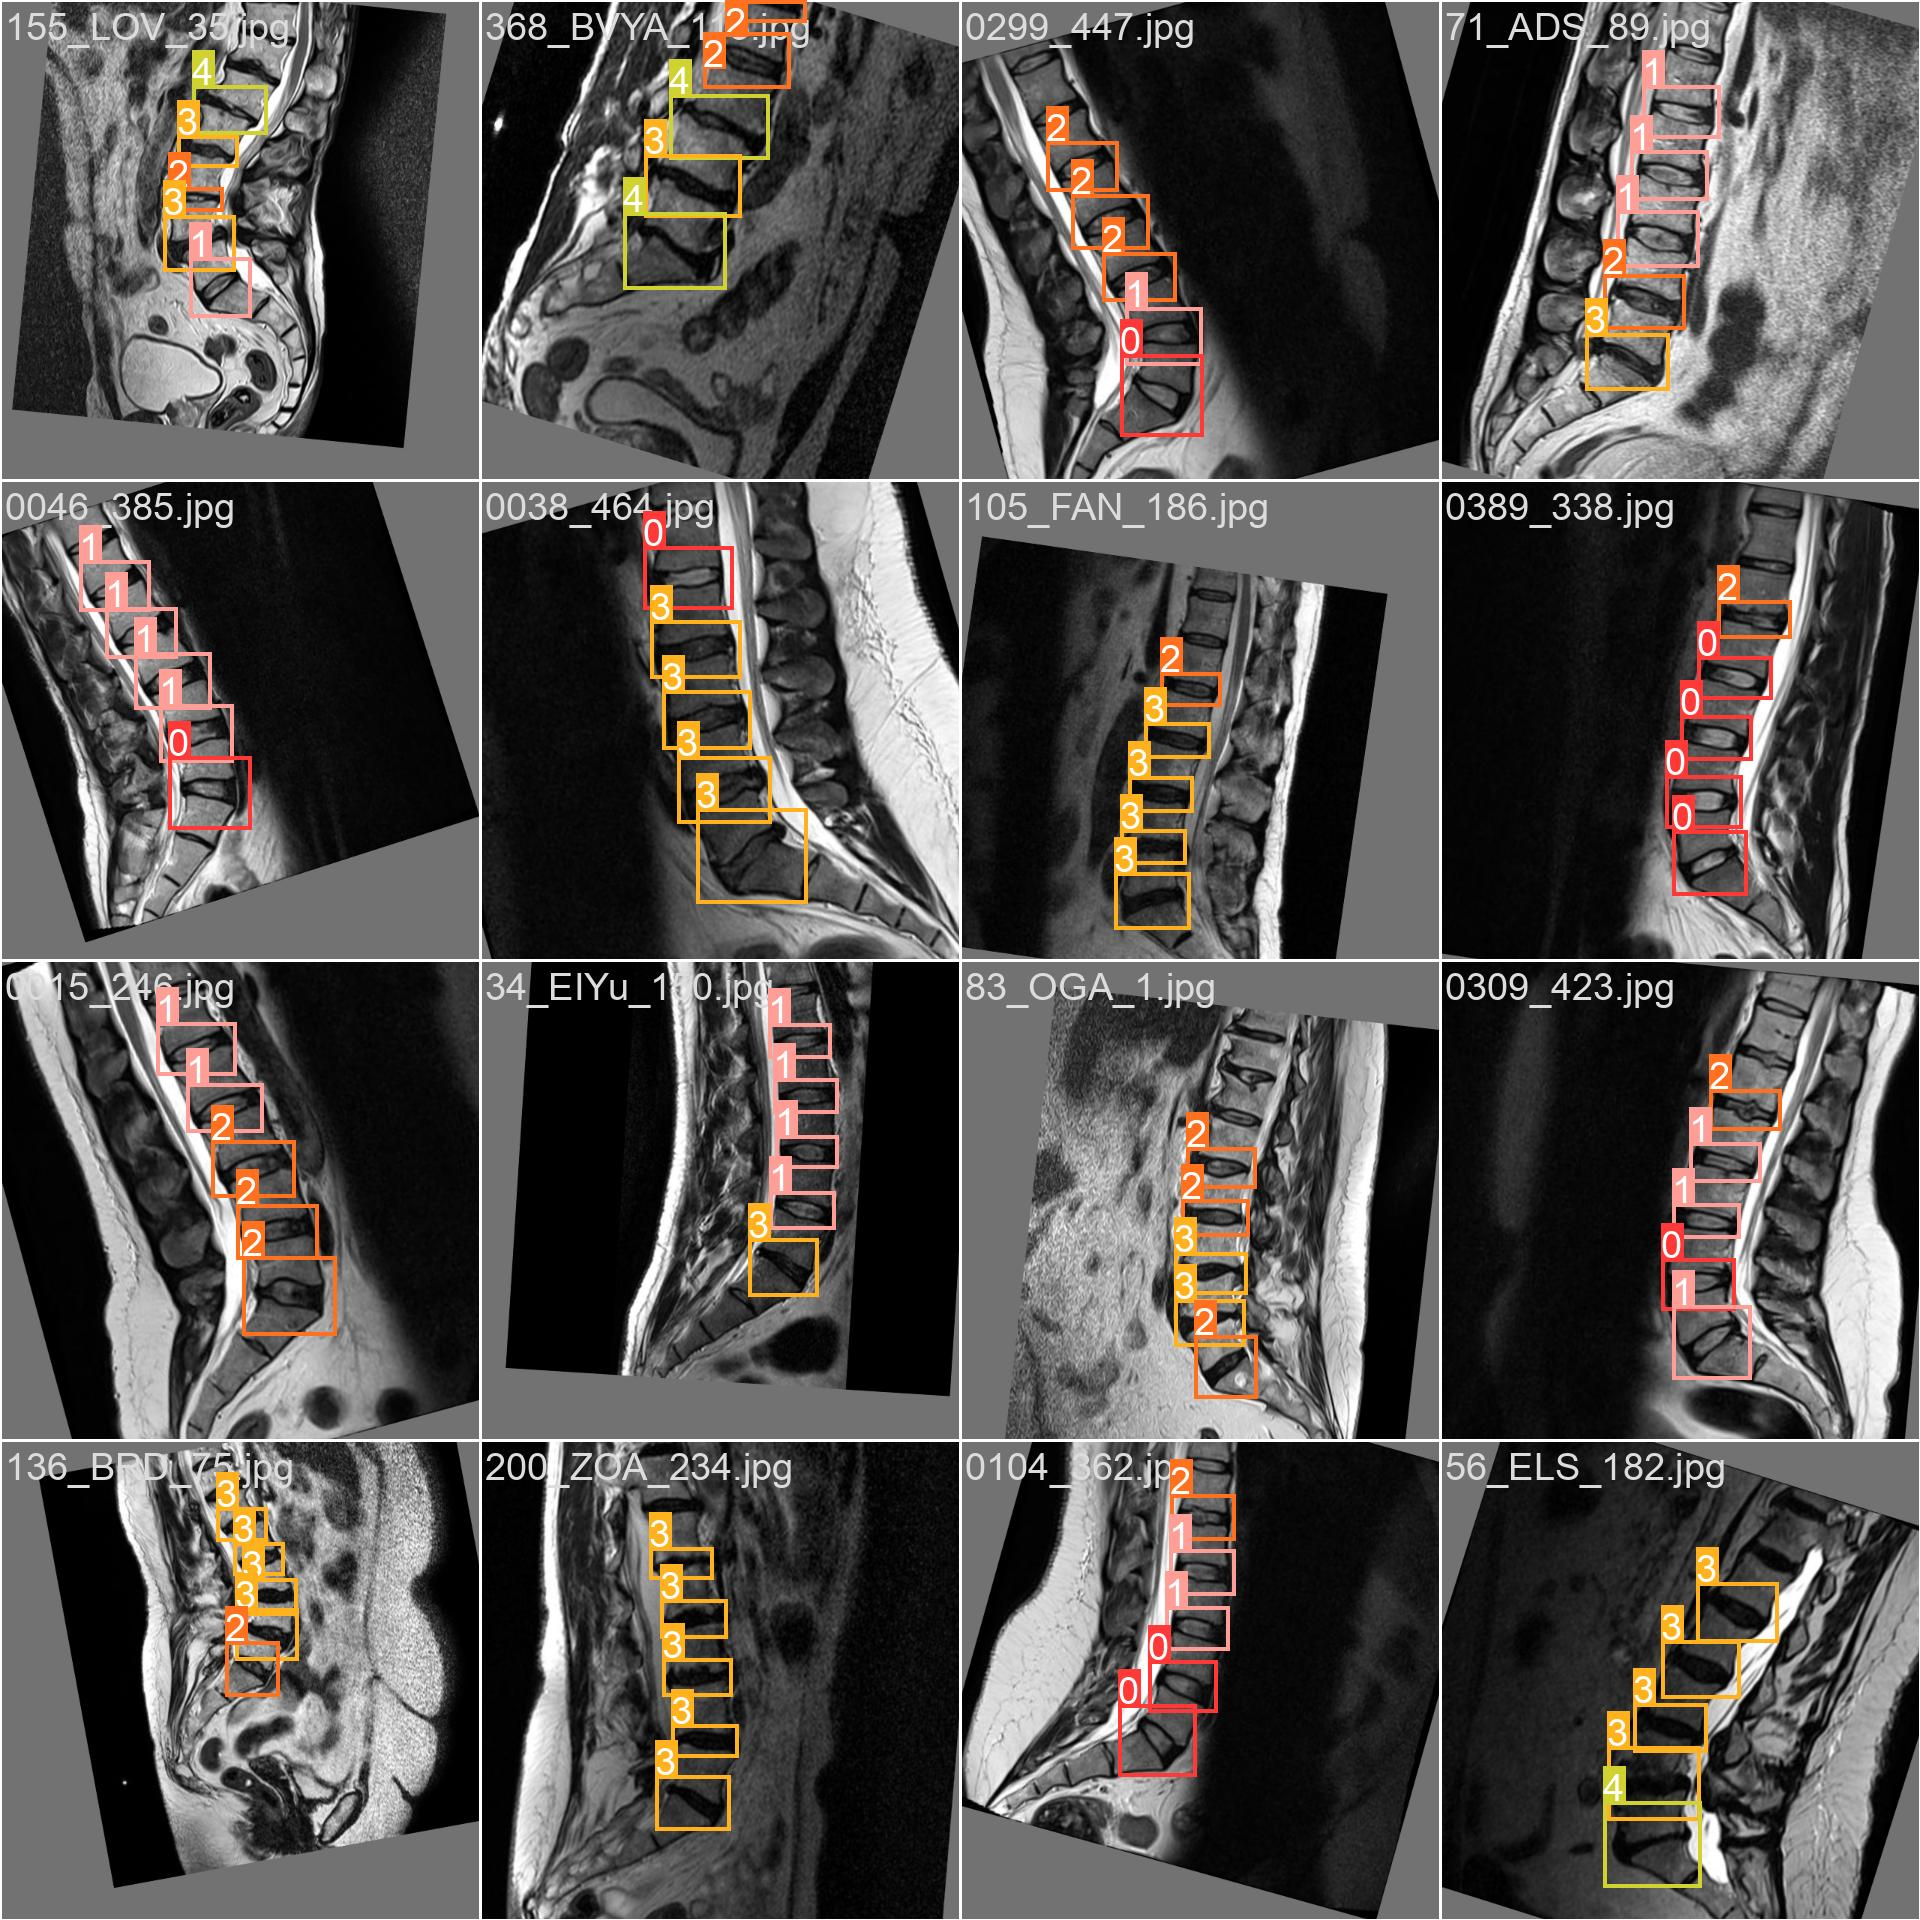


**Figure 1.** Examples of Data Augmentation Techniques Applied to MRI Images


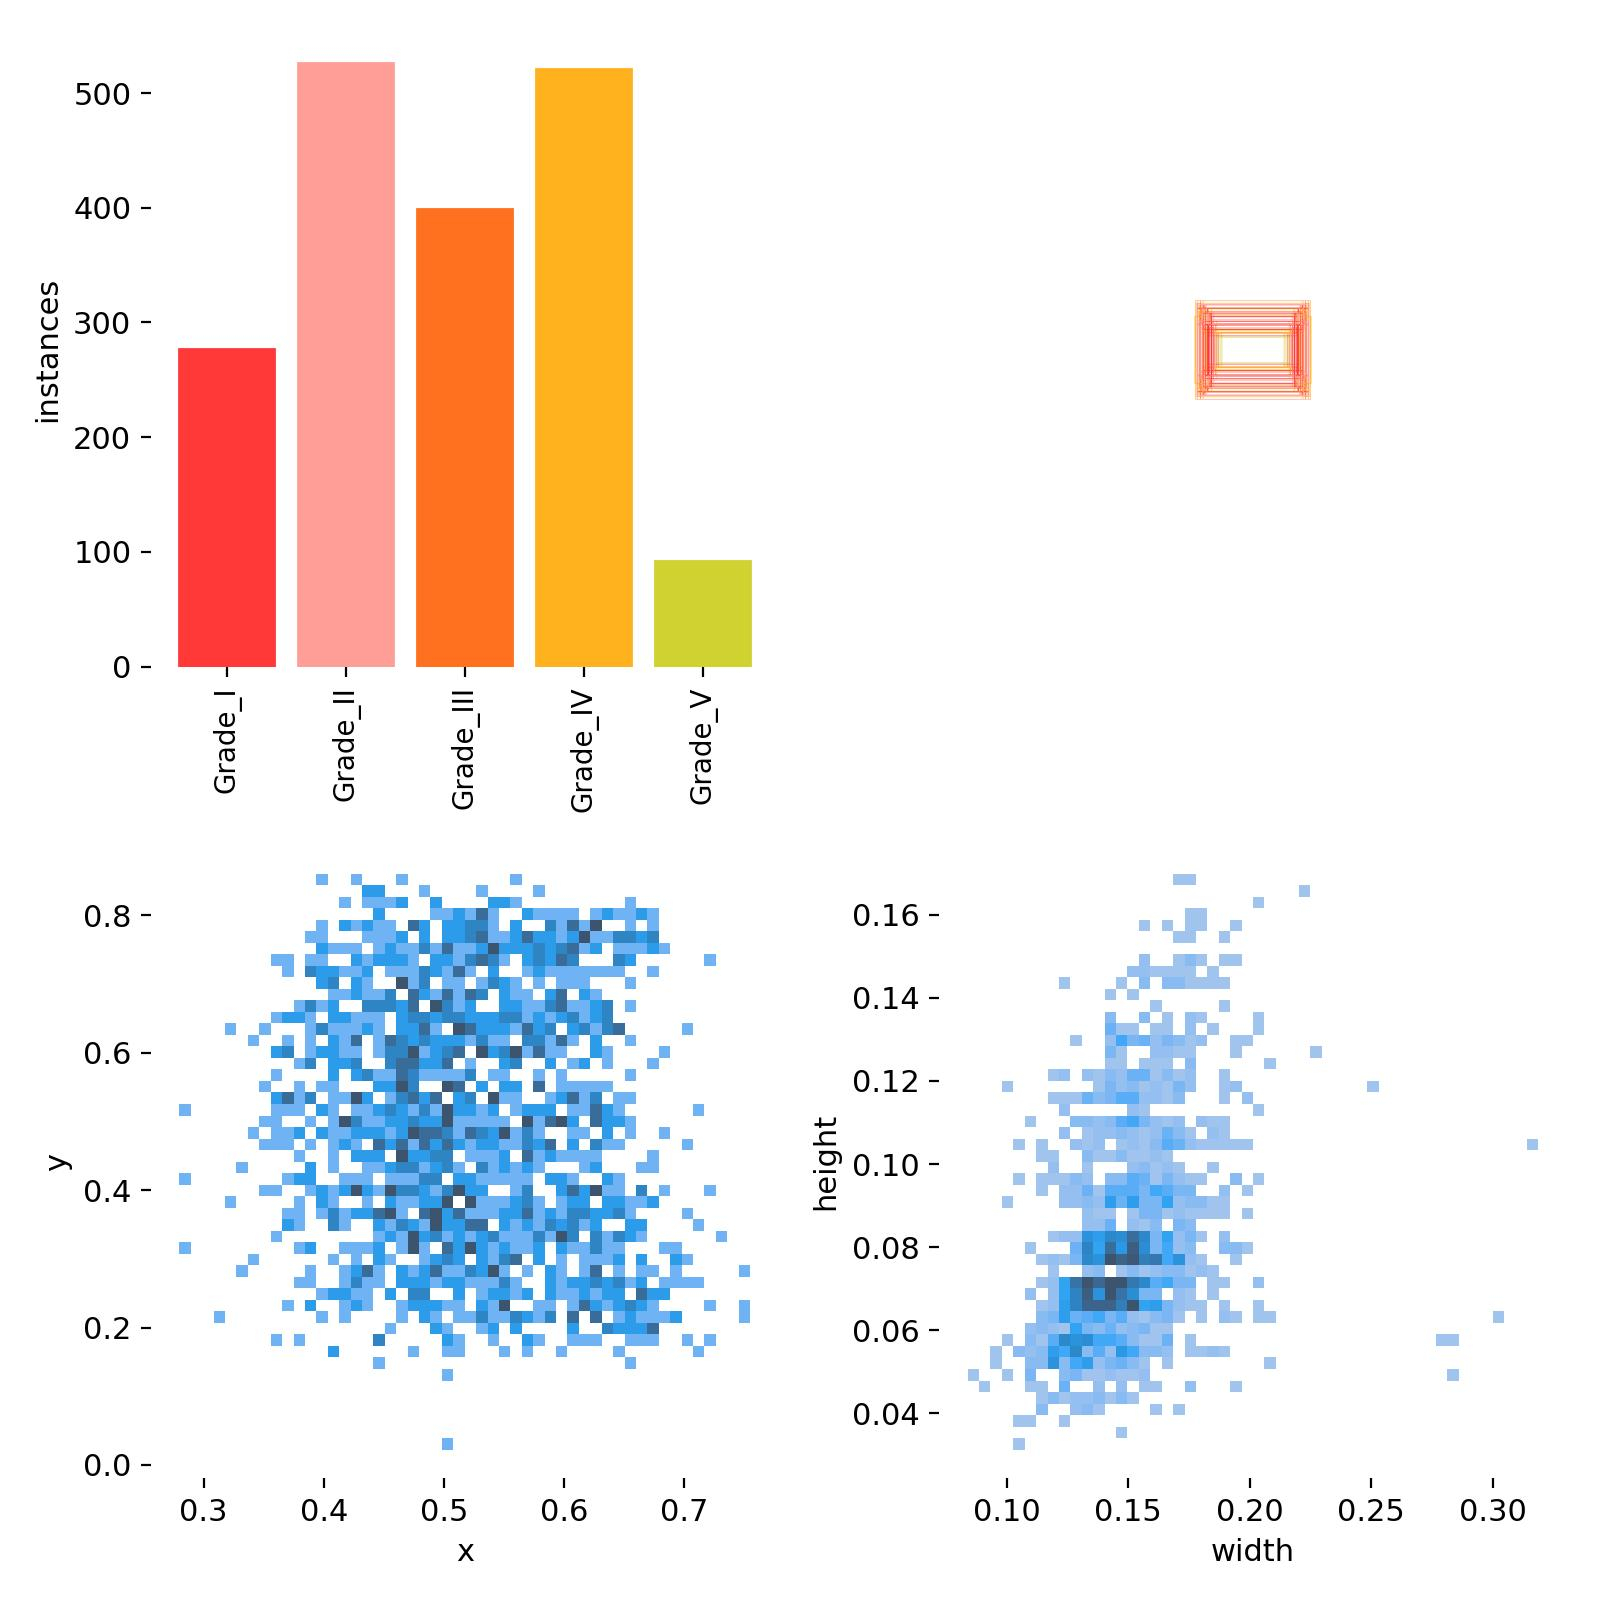


**Figure 2**: А detailed analysis of the dataset, showcasing the distribution of Pfirrmann grades across intervertebral discs alongside the normalized dimensions of bounding boxes. Furthermore, it illustrates the distribution of center coordinates (x, y) for these bounding boxes, as well as their normalized heights and widths, with values ranging from 0 to 1—a format aligned with the YOLO object detection framework
